# Supplementary material
Source: PubMed Central journal article supplement (PMC5063111)
Supplement: EJI-46-372-s002.pdf [file EJI-46-372-s002.pdf]

# Supporting Information Figure 1

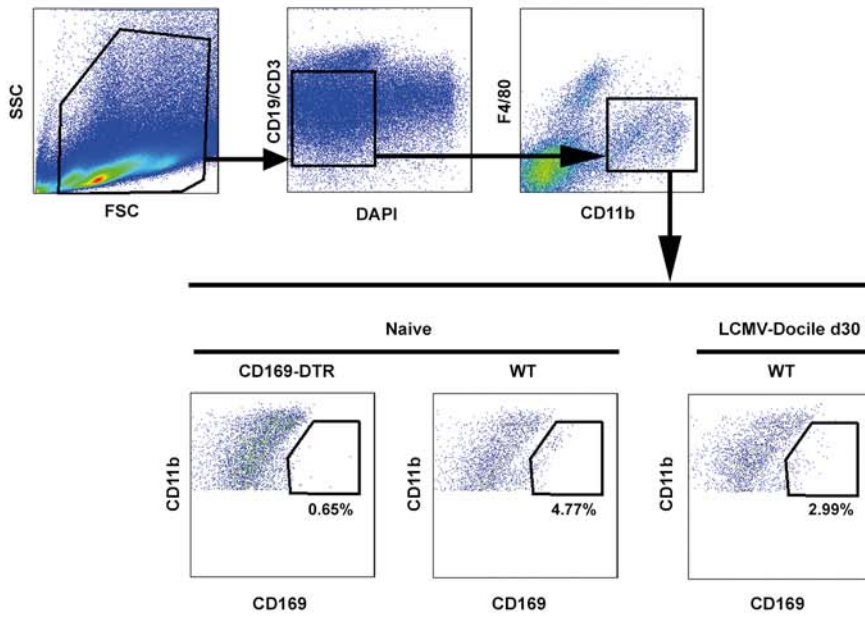

**Supporting Information, Figure 1.** FACS staining of cells from C57BL/6 WT mice infected with  $2 \times 10^4$  PFU lymphocytic choriomeningitis virus strain Docile (LCMV-Docile) for 30 days or left uninfected. Naïve CD169-diphtheria toxin receptor (DTR) mice were treated with diphtheria toxin ( $30 \mu\text{g}/\text{kg}$ ) on day -3 and were used as negative controls. Splenocytes were stained with the immunofluorescence antibodies DAPI, CD3, CD19, F4/80, CD11b, and mSiglec-1 (CD169) ( $n = 3$ ).
